# Supplementary material for: 3D bioprinting of GelMA with enhanced extrusion printability through coupling sacrificial carrageenan
Source: Royal Society of Chemistry journal article supplement (doi:10.1039/d3bm01489d), 2023-12-07
Supplement: d3bm01489d1.pdf [file d3bm01489d1.pdf]

Table S1 The table of abbreviations

| Abbreviation | Full name                                        |
|--------------|--------------------------------------------------|
| GelMA:       | Gelatin Methacryloyl                             |
| Car:         | Carrageenan                                      |
| BMSCs        | Bone Marrow-Derived Mesenchymal Stem Cells       |
| MA           | Methacrylate                                     |
| LAP          | Lithium Phenyl-2,4,6-Trimethylbenzoylphosphonate |
| GAG          | Glycosaminoglycan                                |
| dECM         | Decellularized Extracellular Matrix              |
| ALP          | Alkaline Phosphatase                             |
| HUVECs       | Human Umbilical Cord Vein Endothelial Cells      |
| FBS          | Fetal Bovine Serum                               |
| Runx2        | Runt-related Transcription Factor 2              |
| OCN          | Osteocalcin                                      |
